# Supplementary material for: Cloud Modelling of Property-Level Flood Exposure in Megacities
Source: MDPI journal article supplement (doi:10.3390/w15193395), 2023-09-27

## Supplementary Material – Flood Maps

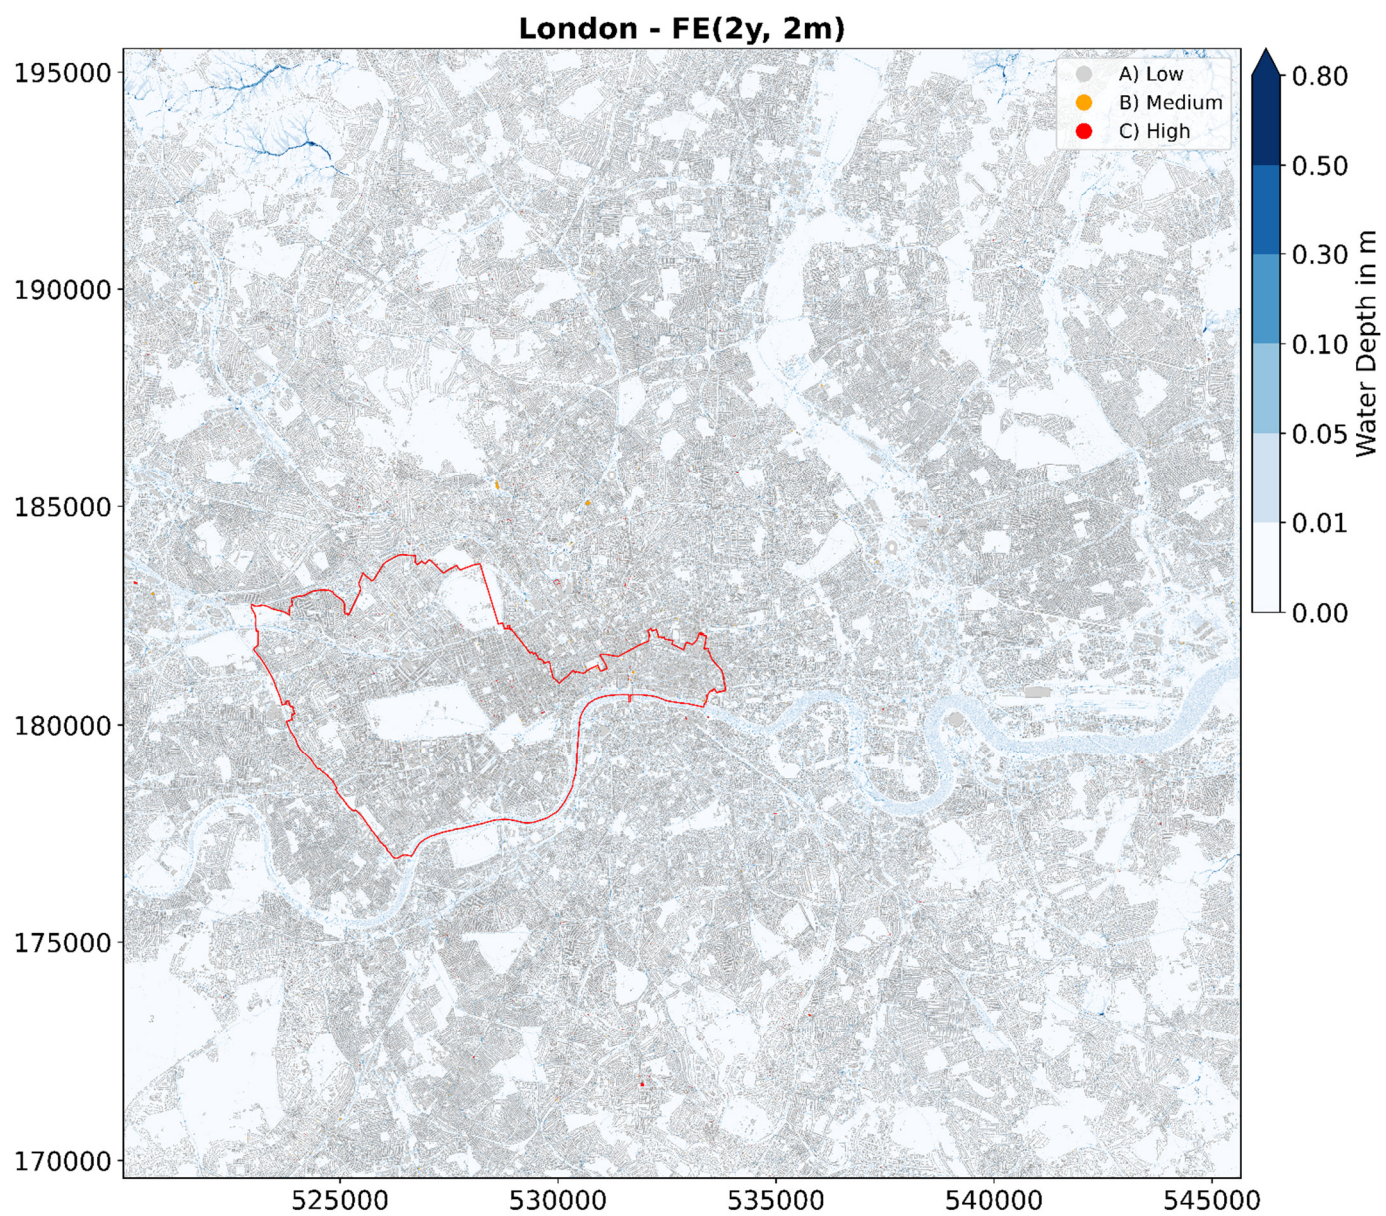



London - FE(5y, 2m)

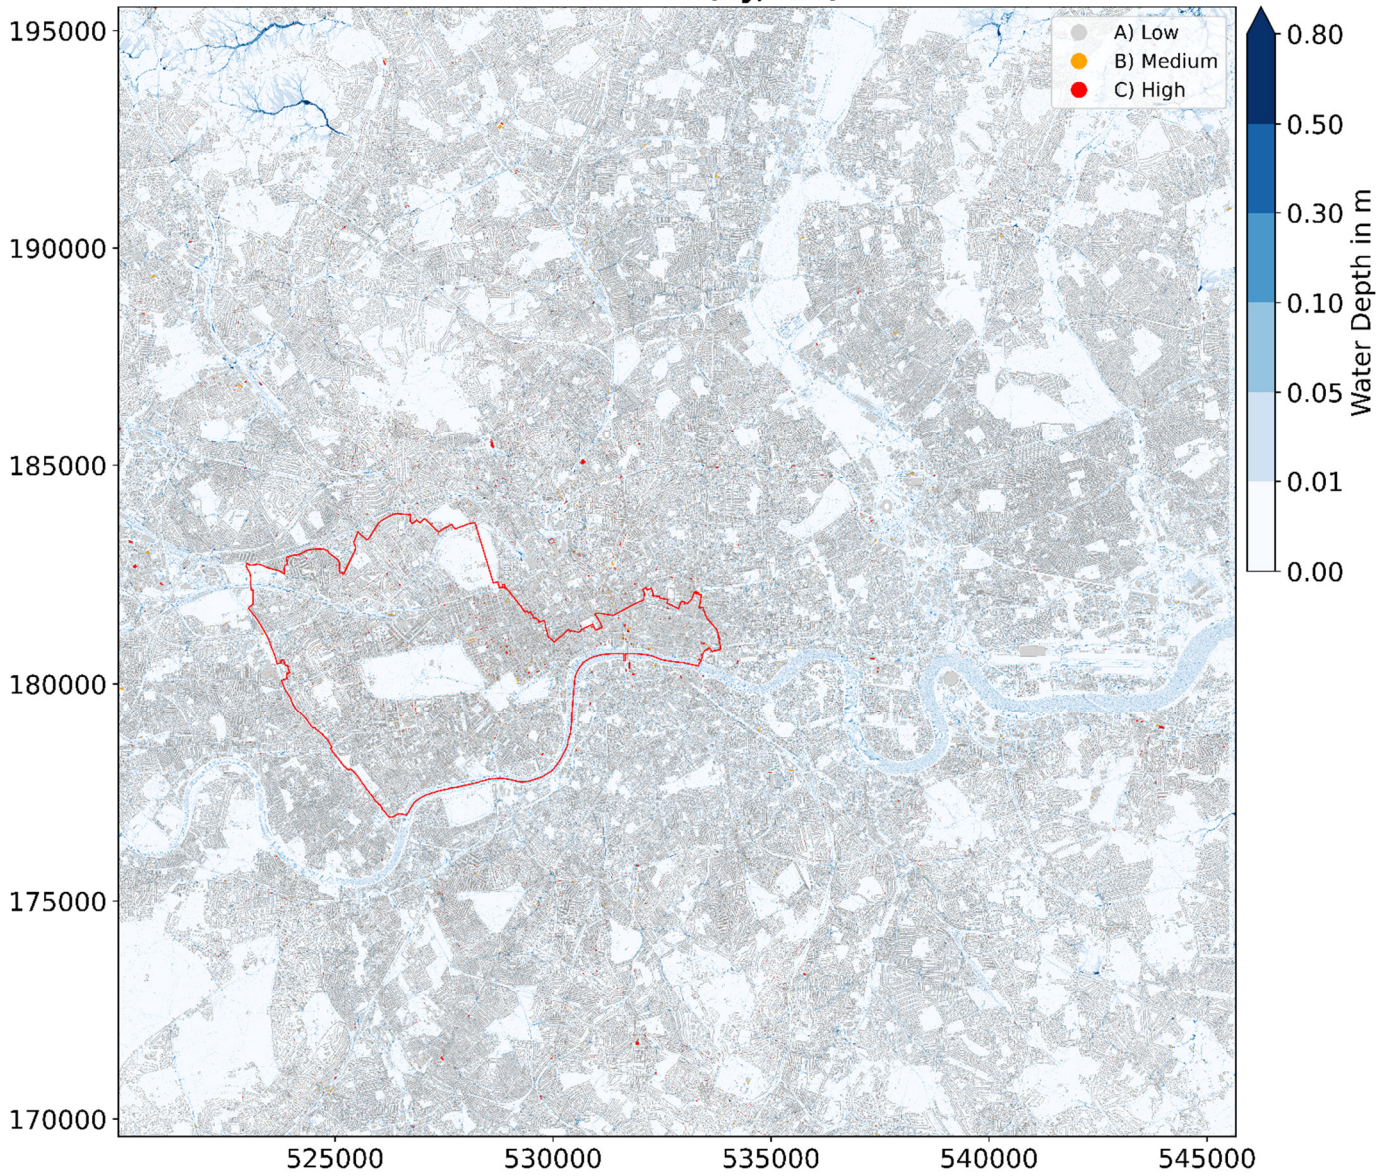



**London - FE(10y, 2m)**

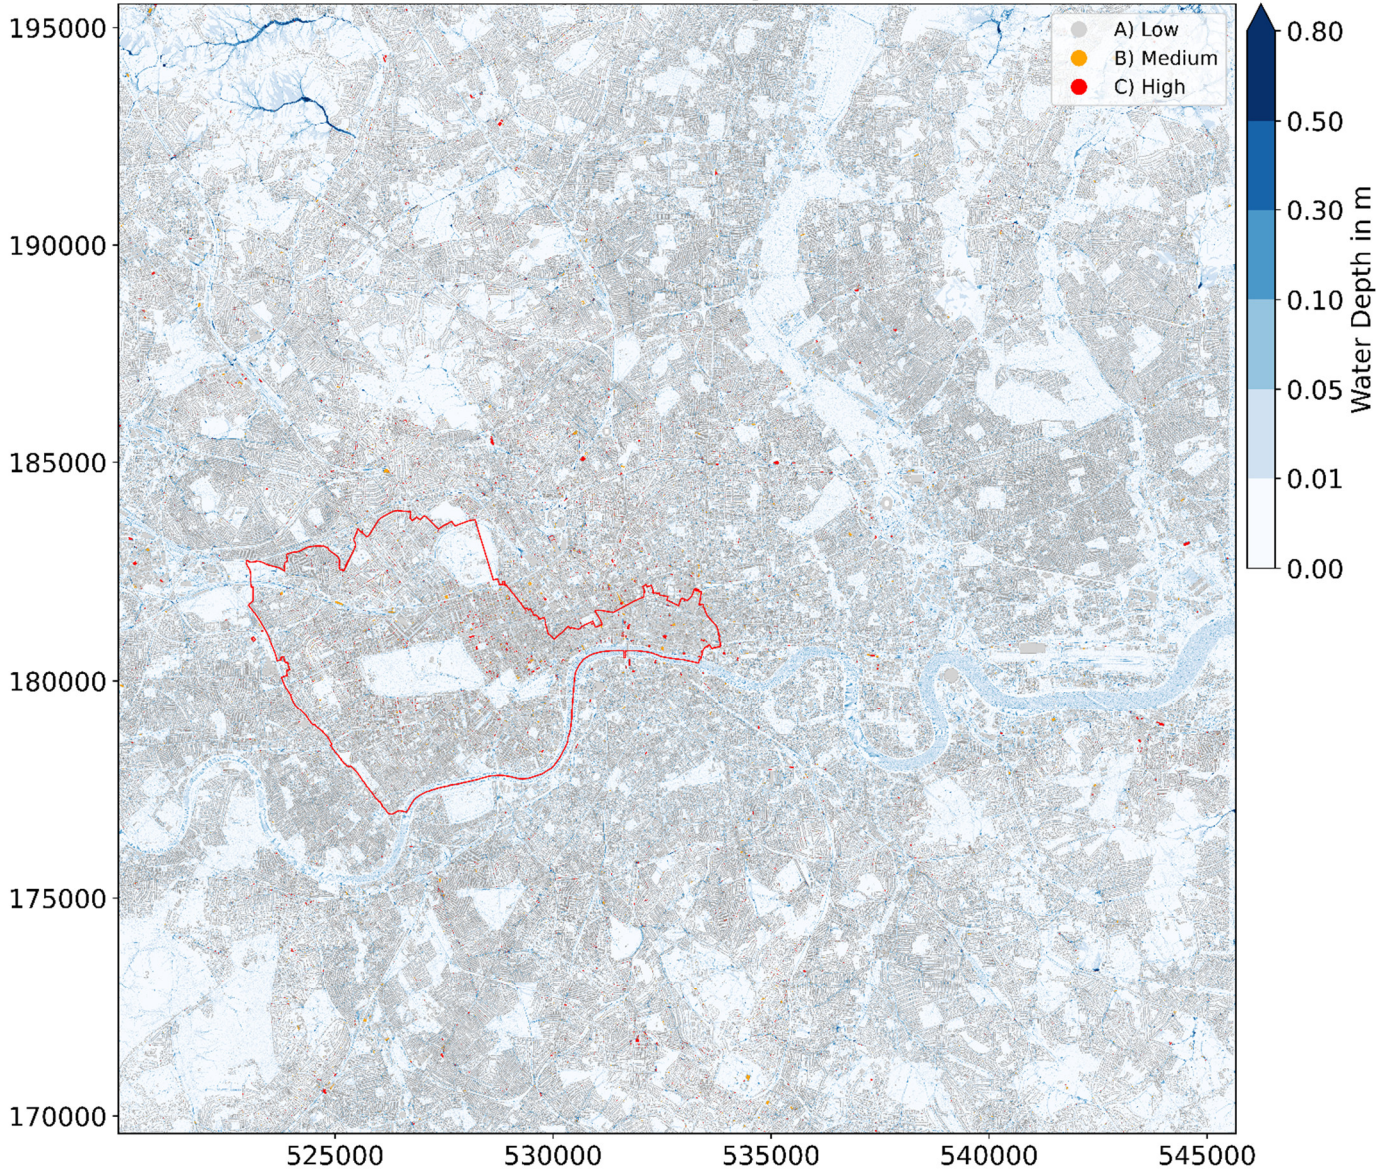



**London - FE(20y, 2m)**

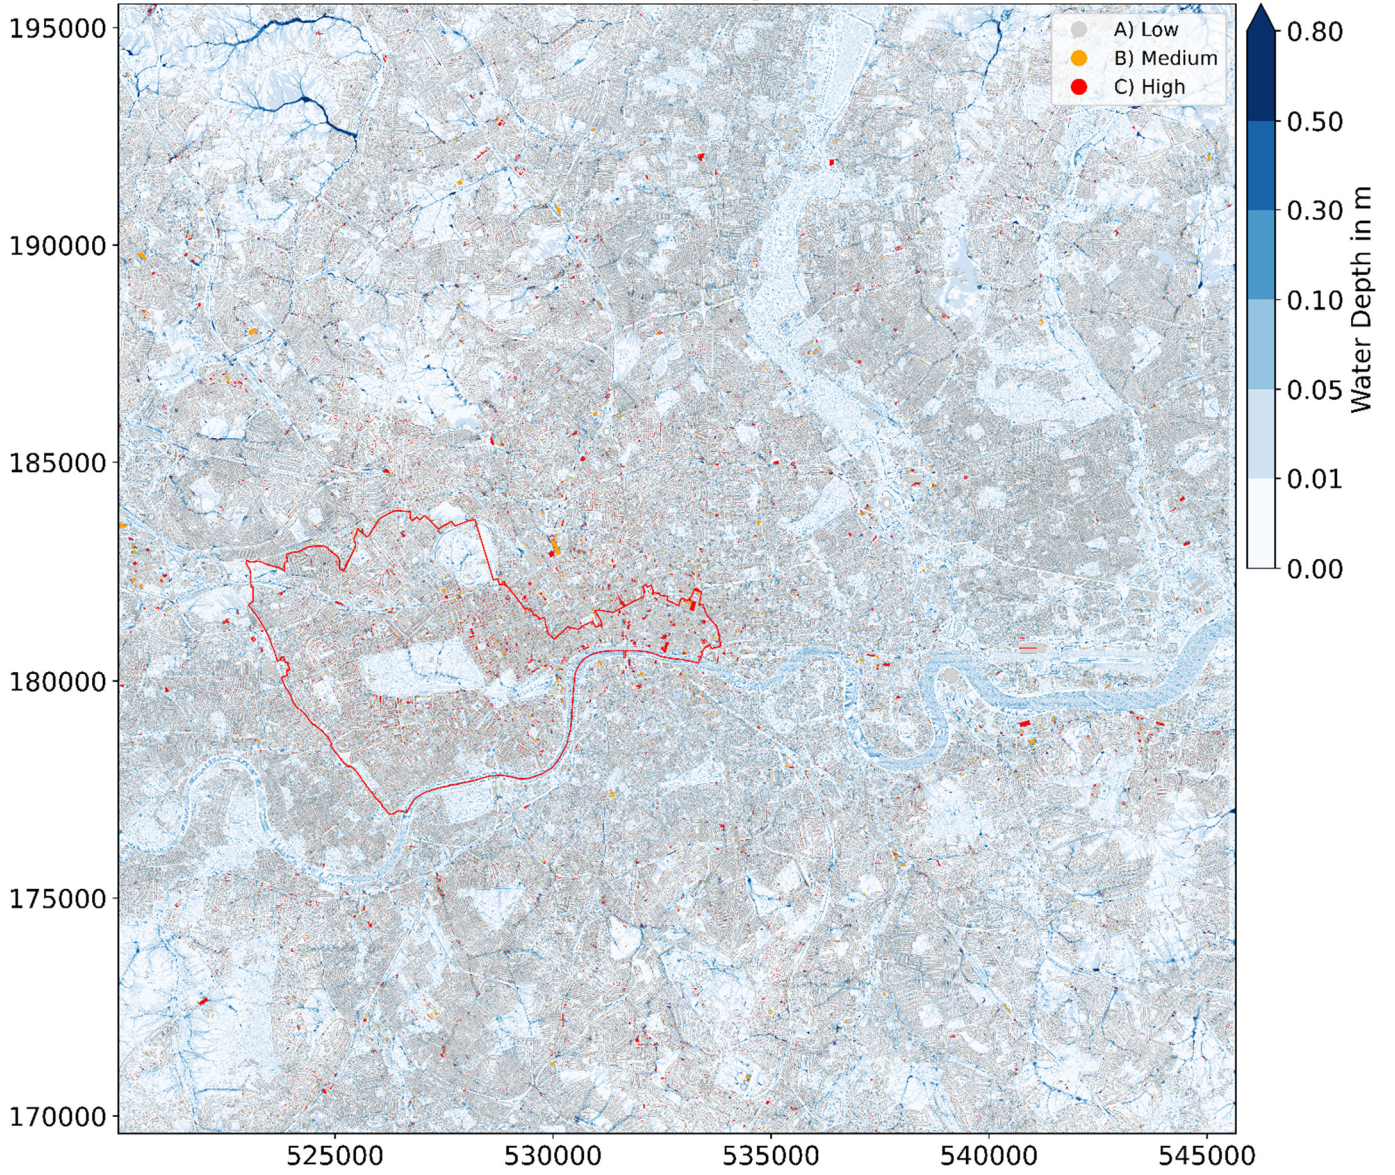



**London - FE(50y, 2m)**

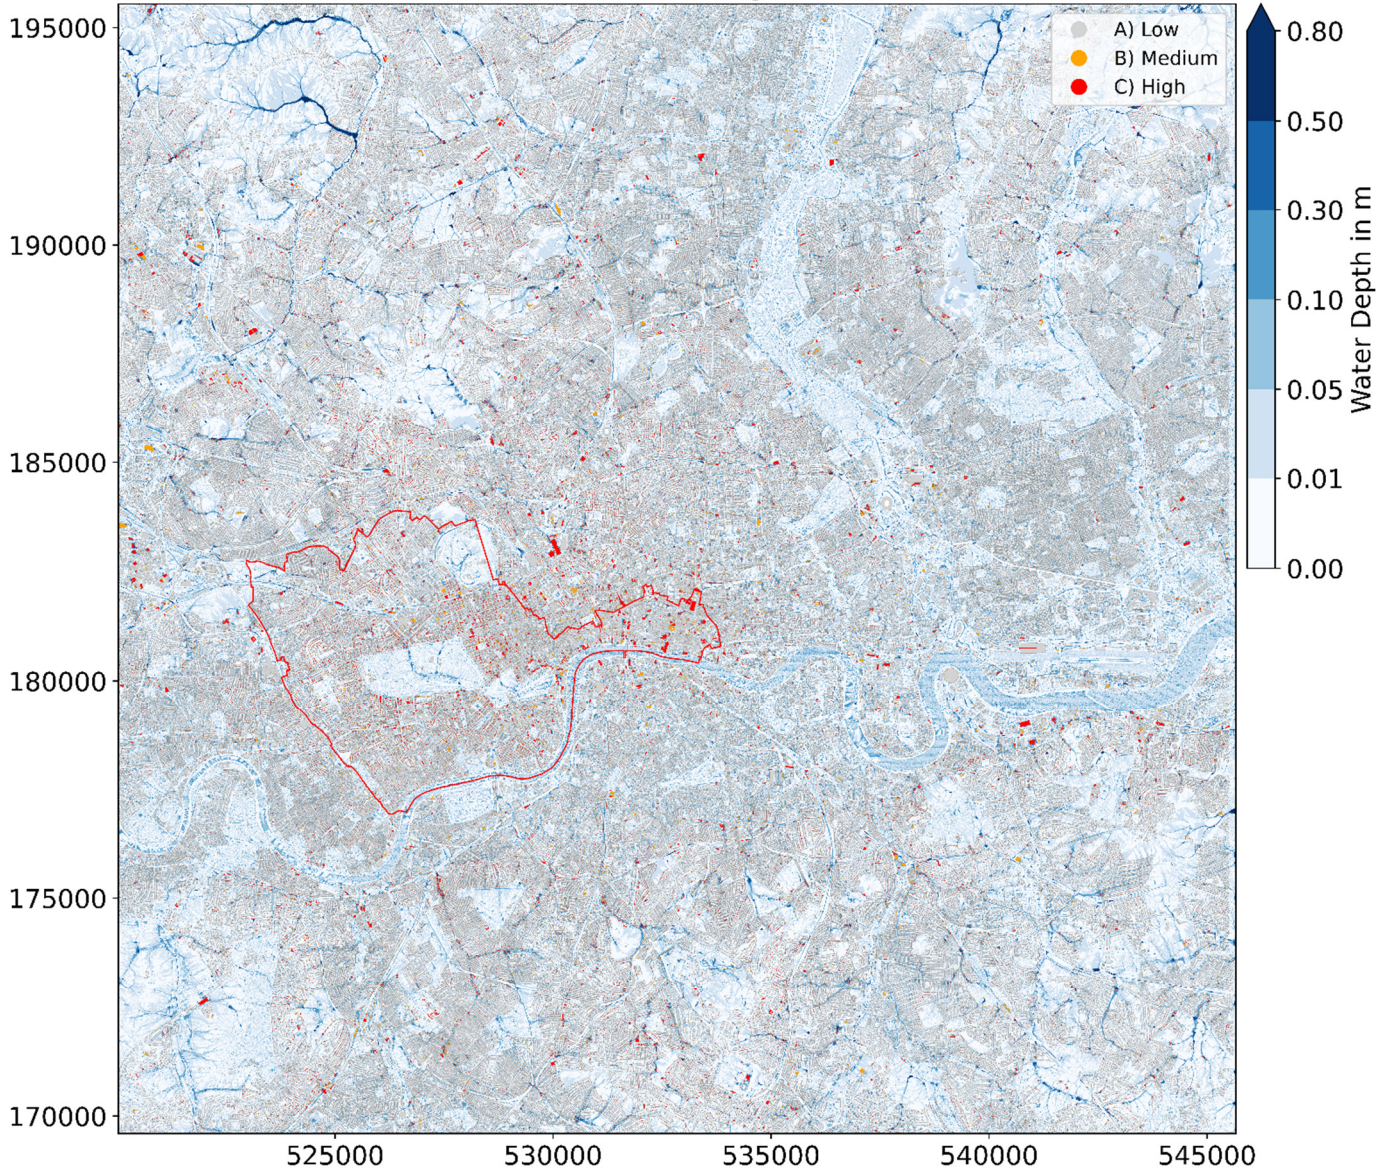



**London - FE(100y, 2m)**

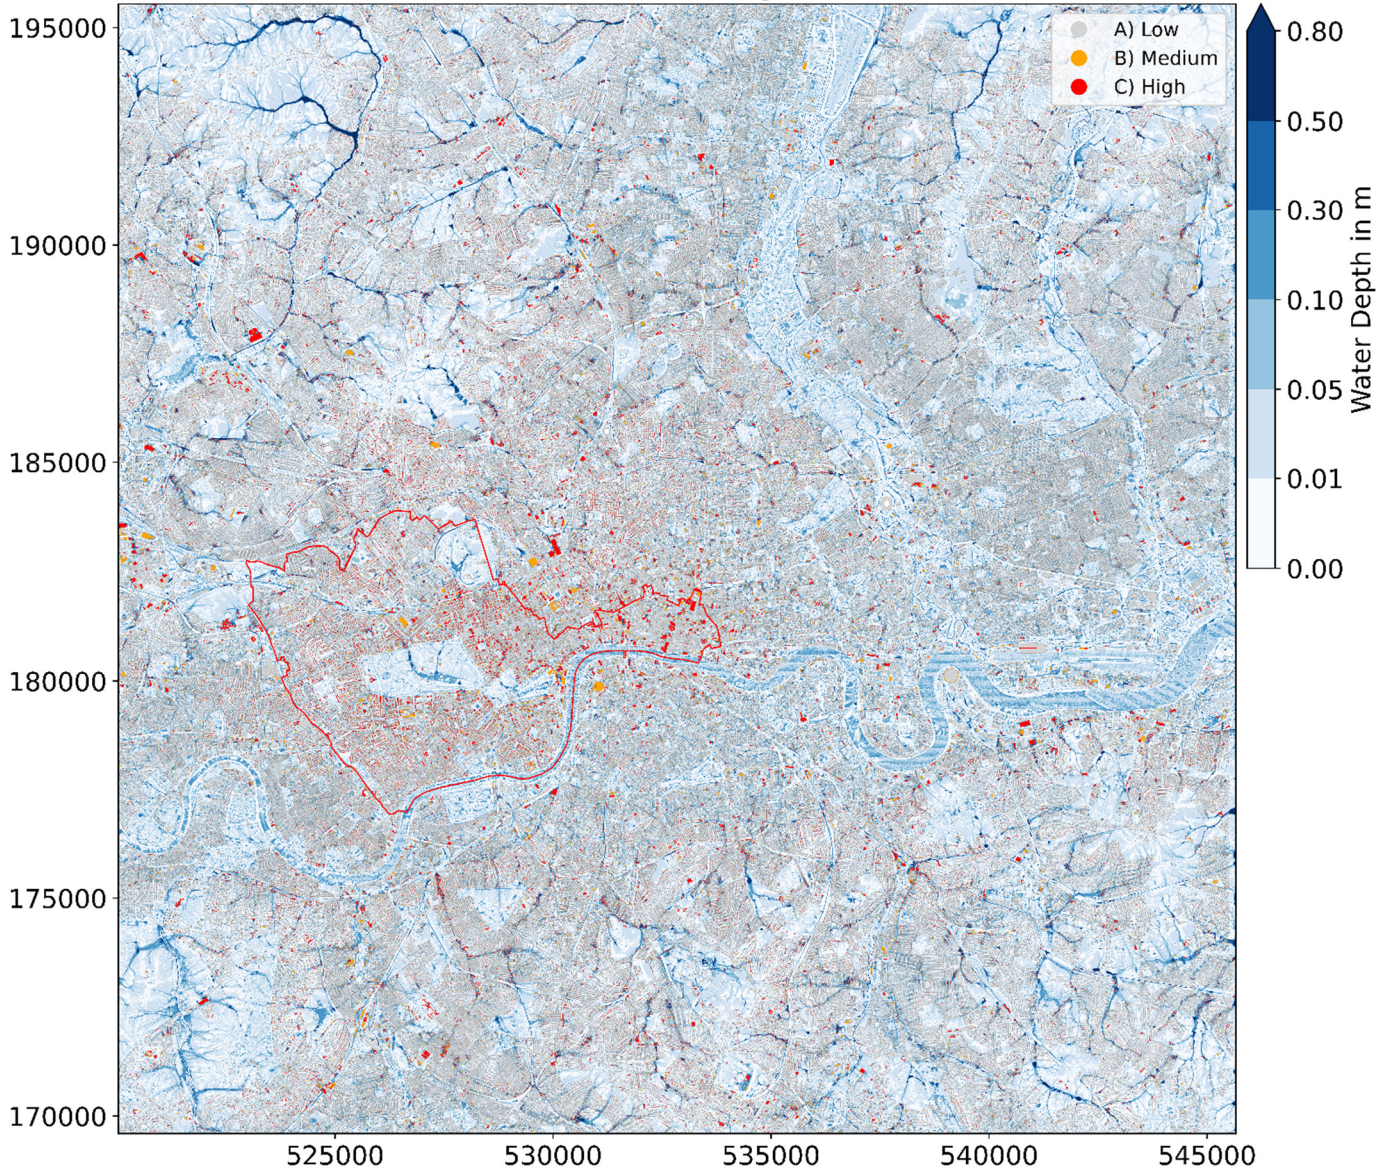

Supplement: s1 [file s1]
